## CONTENTS

|                                                                    |     |
|--------------------------------------------------------------------|-----|
| <b>1. Commentary</b>                                               | v1  |
| <b>D. Goldsmith</b>                                                |     |
| <b>2. The protein science of biosimilars</b>                       | v4  |
| <b>M. Kuhlmann and A. Covic</b>                                    |     |
| <b>3. Immunogenicity of biopharmaceuticals</b>                     | v9  |
| <b>M. Kessler, D. Goldsmith and H. Schellekens</b>                 |     |
| <b>4. Comparative testing and pharmacovigilance of biosimilars</b> | v13 |
| <b>F. Locatelli and S. Roger</b>                                   |     |
| <b>5. European regulatory guidelines for biosimilars</b>           | v17 |
| <b>A. Wiecek and A. Mikhail</b>                                    |     |

All reasonable precautions have been taken by the authors, editors, and publishers to verify drug names and doses, the results of experimental work, and the clinical findings published in this Supplement. The opinions expressed are those of the authors, and not necessarily those of the editors or publishers. The ultimate responsibility for the use and dosage of drugs mentioned in this Supplement and in the interpretation of published material lies with the medical practitioners and the editors and publishers can accept no liability whatsoever in respect of any claim for damages arising therefrom. Please inform the editors of any errors.

*Please visit the Journal's World Wide Web site at [www.ndt.oxfordjournals.org](http://www.ndt.oxfordjournals.org)*
